# Supplementary material for: Facile synthesis of carbon-doped graphitic C3N4@MnO2 with enhanced electrochemical performance
Source: Royal Society of Chemistry journal article supplement (doi:10.1039/c6ra18265h), 2016-01-01
Supplement: c6ra18265h1.pdf [file c6ra18265h1.pdf]

## Supplementary Information

### Facile Synthesis of Carbon-Doped Graphitic C<sub>3</sub>N<sub>4</sub>@MnO<sub>2</sub> with Enhanced Electrochemical Performance

*Qian Yuan Shan<sup>1</sup>, Bo Guan<sup>1</sup>, Shi Jin Zhu<sup>1</sup>, Hai Jun Zhang<sup>2\*</sup>, Yu Xin Zhang<sup>1,3\*</sup>*

<sup>1</sup>College of Materials Science and Engineering, Chongqing University, Chongqing 400044, P.R. China

<sup>2</sup>State Key Laboratory of Refractories and Metallurgy, Wuhan University of Science and Technology, Wuhan 430081, P.R. China.

<sup>3</sup>National Key Laboratory of Fundamental Science of Micro/Nano-Devices and System Technology, Chongqing University, Chongqing 400044, P.R. China

\*E-mail: zhangyuxin@cqu.edu.cn (Dr. Y.X. Zhang); zhanghaijun@wust.edu.cn (Dr. H.J. Zhang)

**Fig. S1** Nitrogen adsorption-desorption isotherms and the corresponding BJH pore-size distribution of (a) CCNM-1; (b) CCNM-3.

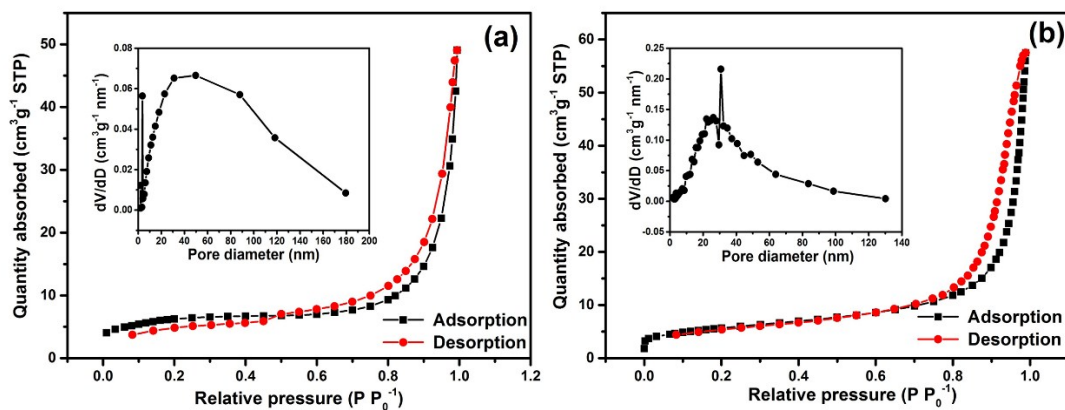

**Table S1** The specific capacitance of the samples measured in 1 M Na<sub>2</sub>SO<sub>4</sub> solution at the current density of 0.2 A g<sup>-1</sup>.

| Samples                 | g-C <sub>3</sub> N <sub>4</sub> | MnO <sub>2</sub> aggregation | CCNM-1 | CCNM-2 | CCNM-3 |
|-------------------------|---------------------------------|------------------------------|--------|--------|--------|
| Cs (F g <sup>-1</sup> ) | 2                               | 57                           | 152    | 324    | 145    |

**Table S2** Comparison of the capacitor performance with other MnO<sub>2</sub> based electrode reported in literature.

| Samples                                                            | Cs (F g <sup>-1</sup> ) | Electrolyte                           | Test condition         | Reference |
|--------------------------------------------------------------------|-------------------------|---------------------------------------|------------------------|-----------|
| Nanostructured MnO <sub>2</sub>                                    | 168                     | 1 M Na <sub>2</sub> SO <sub>4</sub>   | 0.2 A g <sup>-1</sup>  | 1         |
| MnO <sub>2</sub> with 1 wt.% SDS                                   | 187.8                   | 1 M Na <sub>2</sub> SO <sub>4</sub>   | 0.2 A g <sup>-1</sup>  | 2         |
| MnO <sub>2</sub> /NiO@Ni                                           | 218                     | 1 M KOH                               | 3 A g <sup>-1</sup>    | 3         |
| 3D graphene @ CNT s@ MnO <sub>2</sub>                              | 245                     | 1 M Na <sub>2</sub> SO <sub>4</sub>   | 0.5 A g <sup>-1</sup>  | 4         |
| CeO <sub>2</sub> @MnO <sub>2</sub> core-shell heterostructure      | 255                     | 1 M Na <sub>2</sub> SO <sub>4</sub>   | 0.25 A g <sup>-1</sup> | 5         |
| PPy/graphene/MnO <sub>2</sub> composite                            | 258                     | 1 M Na <sub>2</sub> SO <sub>4</sub>   | 1 A g <sup>-1</sup>    | 6         |
| MnO <sub>2</sub> on hollow carbon spheres                          | 263.5                   | 1 M Na <sub>2</sub> SO <sub>4</sub>   | 1 A g <sup>-1</sup>    | 7         |
| NiO@MnO <sub>2</sub> core/shell nanocomposite                      | 266.7                   | 2 M KOH                               | 0.5 A g <sup>-1</sup>  | 8         |
| Y/ZrO <sub>2</sub> @MnO <sub>2</sub>                               | 283.1                   | 0.5 M Na <sub>2</sub> SO <sub>4</sub> | 0.05 A g <sup>-1</sup> | 9         |
| Na <sup>+</sup> -intercalated MnO <sub>2</sub>                     | 295                     | 1 M Na <sub>2</sub> SO <sub>4</sub>   | 1 A g <sup>-1</sup>    | 10        |
| H-TiO <sub>2</sub> /C/MnO <sub>2</sub>                             | 299.8                   | 1 M Na <sub>2</sub> SO <sub>4</sub>   | 0.5 A g <sup>-1</sup>  | 11        |
| Spherical alpha-MnO <sub>2</sub>                                   | 328.4                   | 1 M Na <sub>2</sub> SO <sub>4</sub>   | 0.1 A g <sup>-1</sup>  | 12        |
| Birnessite-type MnO <sub>2</sub> nanoparticles                     | 329                     | 1 M Na <sub>2</sub> SO <sub>4</sub>   | 0.2 A g <sup>-1</sup>  | 13        |
| Co <sub>3</sub> O <sub>4</sub> @MnO <sub>2</sub> core/shell arrays | 960                     | 1 M LiOH                              | 0.1 A cm <sup>2</sup>  | 14        |
| CCNM02                                                             | 324                     | 1 M Na <sub>2</sub> SO <sub>4</sub>   | 0.2 A g <sup>-1</sup>  | This work |

## Reference

1. V. Subramanian, H. Zhu and B. Wei, *J Power Sources*, 2006, **159**, 361-364.
2. Y. Dai, J. L. Li, G. Yan, G. F. Xu, Q. R. Xue and F. Y. Kang, *J Alloy Compd*, 2015, **621**, 86-92.
3. S. Saha, S. Chhetri, P. Khanra, P. Samanta, H. Koo, N. C. Murmu and T. Kuila, *J Energy Storage*, 2016, **6**, 22-31.
4. J. J. Chen, Y. Huang, X. Zhang, X. F. Chen and C. Li, *Ceram Int*, 2015, **41**, 12680-12685.
5. S. J. Zhu, J. Q. Jia, T. Wang, D. Zhao, J. Yang, F. Dong, Z. G. Shang and Y. X. Zhang, *Chem Commun*, 2015, **51**, 14840-14843.
6. W. H. Sun, L. H. Chen, Y. B. Wang, Y. Q. Zhou, S. J. Meng, H. L. Li and Y. Q. Luo, *Synth React Inorg M*, 2016, **46**, 437-444.
7. C. P. Mao, S. G. Liu, L. Pang, Q. Sun, Y. Liu, M. W. Xu and Z. S. Lu, *Rsc Adv*, 2016, **6**, 5184-5191.
8. J. J. Chen, Y. Huang, C. Li, X. F. Chen and X. Zhang, *Appl Surf Sci*, 2016, **360**, 534-539.
9. Y. Q. Zhang and Y. F. Zhai, *Rsc Adv*, 2016, **6**, 1750-1759.
10. Q. L. Ye, R. T. Dong, Z. H. Xia, G. R. Chen, H. L. Wang, G. J. Tan, L. Jiang and F. Wang, *Electrochim Acta*, 2014, **141**, 286-293.
11. J. Di, X. C. Fu, H. J. Zheng and Y. Jia, *J Nanopart Res*, 2015, **17**.
12. Y. Chen, W. Q. Qin, R. J. Fan, J. W. Wang and B. Z. Chen, *J Nanosci Nanotechno*, 2015, **15**, 9760-9765.
13. X. Zhang, W. Miao, C. Li, X. Z. Sun, K. Wang and Y. W. Ma, *Mater Res Bull*, 2015, **71**, 111-115.
14. W. L. Yang, Z. Gao, J. Ma, X. M. Zhang and J. Wang, *J Alloy Compd*, 2014, **611**, 171-178.
